# Supplementary material for: Detecting Enteric Pathogens in Low-Risk Drinking Water in Dhaka, Bangladesh: An Assessment of the WHO Water Safety Categories
Source: MDPI journal article supplement (doi:10.3390/tropicalmed8060321), 2023-06-14
Supplement: s1 [file s1]

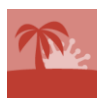

# Supplementary Materials of Detecting Enteric Pathogens in Low-Risk Drinking Water in Dhaka, Bangladesh: An Assessment of the WHO Water Safety Categories

**Table S1.** Target genes, primer sequences, amplicon size for detection of the signature and pathogenic genes of bacteria.

| Genes                                    | Primer Name | Primer Sequences (5' → 3')             | Amplicon Size (bp) | References |
|------------------------------------------|-------------|----------------------------------------|--------------------|------------|
| Diarrheagenic <i>E. coli</i> genes       |             |                                        |                    |            |
| <i>eltB</i>                              | LT-F        | tctctatgtgcatacggagc                   | 322                | [1]        |
|                                          | LT-R        | ccatactgattgccgcaat                    |                    |            |
| <i>estA</i>                              | ST-F        | gctaaaccagta <sup>a</sup> gggtcttcaaaa | 147                | [1]        |
|                                          | ST-F        | cccgggtaca <sup>a</sup> gcaggattacaaca |                    |            |
| <i>vt1</i>                               | VT1-F       | gaagagtcggtgggattacg                   | 130                | [2]        |
|                                          | VT1-R       | agcgatgcagctattaataa                   |                    |            |
| <i>vt2</i>                               | VT2-F       | accgtttttcagatttt <sup>a</sup> cacata  | 298                | [1]        |
|                                          | VT2-R       | tacacaggagcagtttcagacagt               |                    |            |
| <i>eaeA</i>                              | eae-F       | cacacgaataaactgactaaaatg               | 376                | [1]        |
|                                          | eae-R       | aaaaacgctgacccgcacctaata               |                    |            |
| <i>bfpA</i>                              | bfpA-F      | ttcttgggtgcttgcgtgtctttt               | 367                | [1]        |
|                                          | bfpA-R      | ttttgtttgtgtatctttgtaa                 |                    |            |
| <i>ipaH</i>                              | ipaH-F      | gctggaaaaactcagtgctt                   | 424                | [3]        |
|                                          | ipaH-R      | ccagtcctgaataattcattct                 |                    |            |
| pCVD                                     | EA-F        | ctggcgaaagactgtatcat                   | 630                | [4]        |
|                                          | EA-R        | caatgtatagaaatccgctgtt                 |                    |            |
| <i>V. cholerae</i> species specific gene |             |                                        |                    |            |
| <i>ompW</i>                              | ompW-F      | caccaagaaggtgactttattgtg               | 304                | [5]        |
|                                          | ompW-R      | ggtttgcgaattagcttcacc                  |                    |            |
| <i>Salmonella</i> spp.                   |             |                                        |                    |            |
| <i>invA</i>                              | S-invA-F    | cgggtggttttaagcgtactctt                | 796                | [6]        |
|                                          | S-invA-R    | cgaatatgctccacaaggtta                  |                    |            |
| <i>Salmonella enteritidis</i>            |             |                                        |                    |            |
| <i>IE-1</i>                              | SE-IE1-F    | agtgccatacttttaatgac                   | 316                | [7]        |
|                                          | SE-IE1-R    | actatgtcgatacgggtggg                   |                    |            |
| <i>Salmonella typhimurium</i>            |             |                                        |                    |            |
| <i>Flic-C</i>                            | ST-flic C-F | cccgttacaggtggactac                    | 432                | [8]        |
|                                          | ST-flic C-R | agcgggttttcgggtggtgt                   |                    |            |
| <i>Campylobacter</i> spp.                |             |                                        |                    |            |
| 16S rRNA                                 | C412F       | ggatgacacttttcggagc                    | 816                | [9]        |
|                                          | C1228R      | cattgtagcacgtgtgtc                     |                    |            |
| <i>Campylobacter coli</i>                |             |                                        |                    |            |
| <i>cueE</i>                              | CC18F       | ggtatgatttctacaaagcgag                 | 502                | [9]        |
|                                          | CC519R      | ataaaagactatcgtcgcgtg                  |                    |            |
| <i>Campylobacter jejuni</i>              |             |                                        |                    |            |
| cj0414                                   | CJ-F        | caaataaagttagaggtagaatgt               | 161                | [10]       |
|                                          | CJ-R        | ccataagcactagctagctgat                 |                    |            |

## References

1. Svenungsson, B.; Lagergren, Å.; Ekwall, E.; Evengård, B.; Hedlund, K.O.; Kärmell, A.; Löfdahl, S.; Svensson, L.; Weintraub, A. Enteropathogens in adult patients with diarrhea and healthy control subjects: A 1-year prospective study in a Swedish clinic for infectious diseases. *Clin. Infect. Dis.* **2000**, *30*, 770–778.
2. Pollard, D.; Johnson, W.; Lior, H.; Tyler, S.; Rozee, K. Rapid and specific detection of verotoxin genes in *Escherichia coli* by the polymerase chain reaction. *J. Clin. Microbiol.* **1990**, *28*, 540–545.
3. Tornieporth, N.G.; John, J.; Salgado, K.; de Jesus, P.; Latham, E.; Melo, M.; Gunzburg, S.T.; Riley, L.W. Differentiation of pathogenic *Escherichia coli* strains in Brazilian children by PCR. *J. Clin. Microbiol.* **1995**, *33*, 1371–1374.
4. Schmidt, H.; Knop, C.; Franke, S.; Aleksic, S.; Heesemann, J.; Karch, H. Development of PCR for screening of enteroaggregative *Escherichia coli*. *J. Clin. Microbiol.* **1995**, *33*, 701–705.
5. Nandi, B.; Nandy, R.K.; Mukhopadhyay, S.; Nair, G.B.; Shimada, T.; Ghose, A.C. Rapid method for species-specific identification of *Vibrio cholerae* using primers targeted to the gene of outer membrane protein OmpW. *J. Clin. Microbiol.* **2000**, *38*, 4145–4151.
6. Fratomico, P.M. Comparison of culture, polymerase chain reaction (PCR), TaqMan *Salmonella*, and Transia Card *Salmonella* assays for detection of *Salmonella* spp. in naturally-contaminated ground chicken, ground turkey, and ground beef. *Mol. Cell. Probes* **2003**, *17*, 215–221.
7. Wang, S.J.; Yeh, D.B. Designing of polymerase chain reaction primers for the detection of *Salmonella enteritidis* in foods and faecal samples. *Lett. Appl. Microbiol.* **2002**, *34*, 422–427.
8. Paião, F.; Arisitides, L.; Murate, L.; Vilas-Bôas, G.; Vilas-Boas, L.; Shimokomaki, M. Detection of *Salmonella* spp, *Salmonella* Enteritidis and Typhimurium in naturally infected broiler chickens by a multiplex PCR-based assay. *Braz. J. Microbiol.* **2013**, *44*, 37–42.
9. Linton, D.; Lawson, A.; Owen, R.; Stanley, J. PCR detection, identification to species level, and fingerprinting of *Campylobacter jejuni* and *Campylobacter coli* direct from diarrheic samples. *J. Clin. Microbiol.* **1997**, *35*, 2568–2572.
10. Wang, R.F.; Slavik, M.F.; Cao, W.W. A Rapid PCR Method for Direct Detection of Low Numbers of *Campylobacter jejuni*. *J. Rapid Methods Autom. Microbiol.* **1992**, *1*, 101–108.

**Disclaimer/Publisher's Note:** The statements, opinions and data contained in all publications are solely those of the individual author(s) and contributor(s) and not of MDPI and/or the editor(s). MDPI and/or the editor(s) disclaim responsibility for any injury to people or property resulting from any ideas, methods, instructions or products referred to in the content.
